# Supplementary material for: Genetic Diversity and Population Structure of the Invasive Oriental Fruit Fly, Bactrocera dorsalis (Diptera: Tephritidae) in Burkina Faso
Source: MDPI journal article supplement (doi:10.3390/insects15050298), 2024-04-23
Supplement: s1 [file s1]

## Supplementary Figures

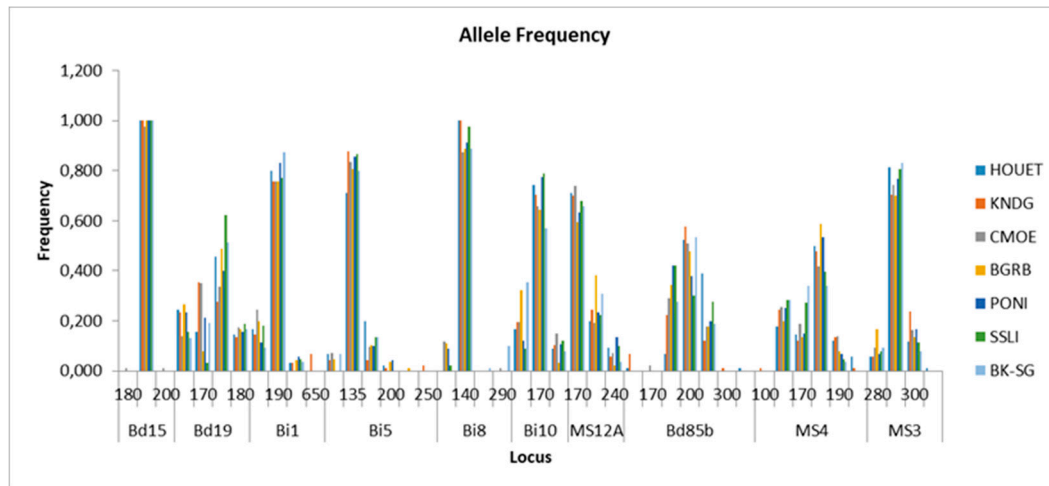

**Figure S1:** Allele frequencies by population with over loci

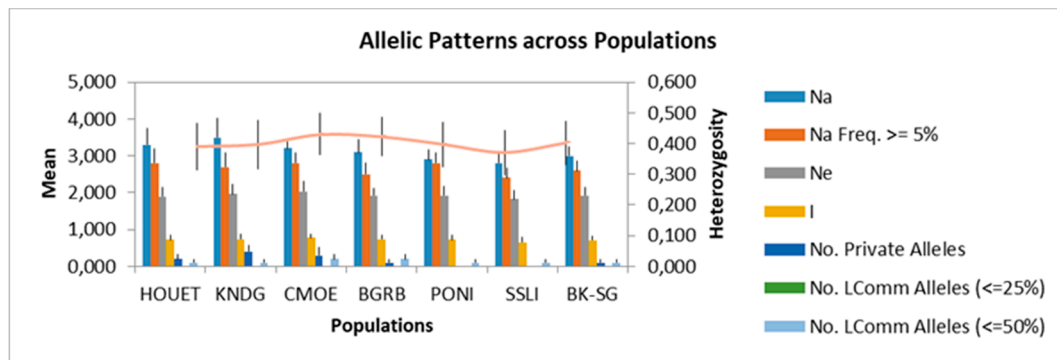

**Figure S2:** Allelic patterns across populations

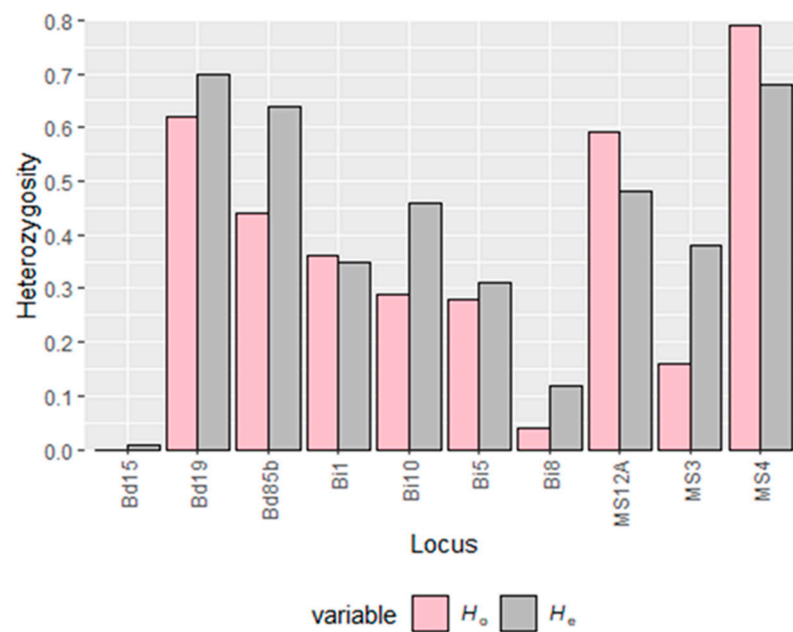

**Figure S3:** Comparison of observed and expected heterozygosity averages by locus

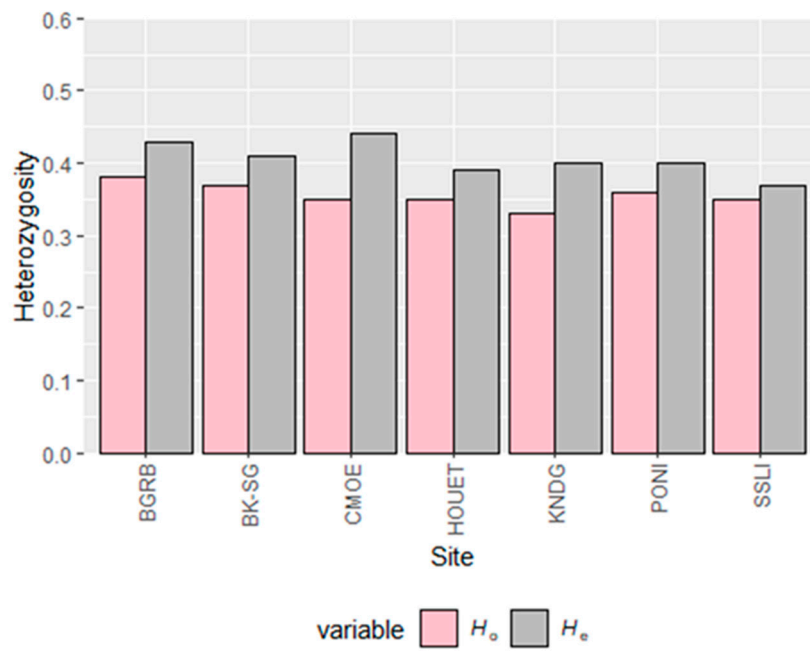

**Figure S4:** Comparison of observed and expected heterozygosity averages by sub-population

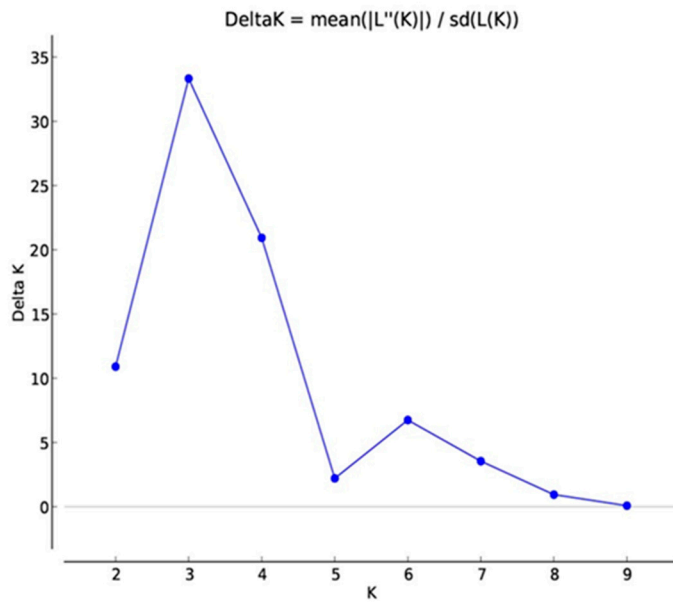

**Figure S5:** Evanno et al. (2005) plots for detecting the best number of K value [39].

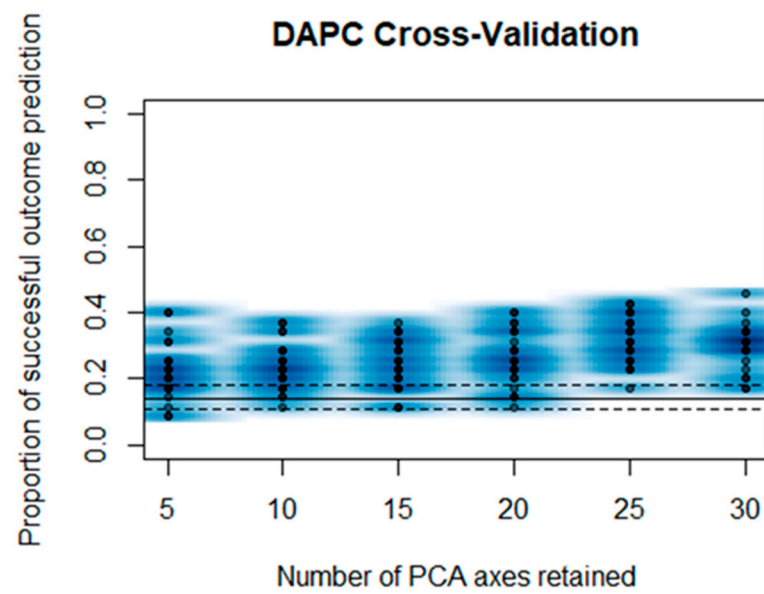

**Figure S6:** DAPC cross-validation plot for the best number of PCs

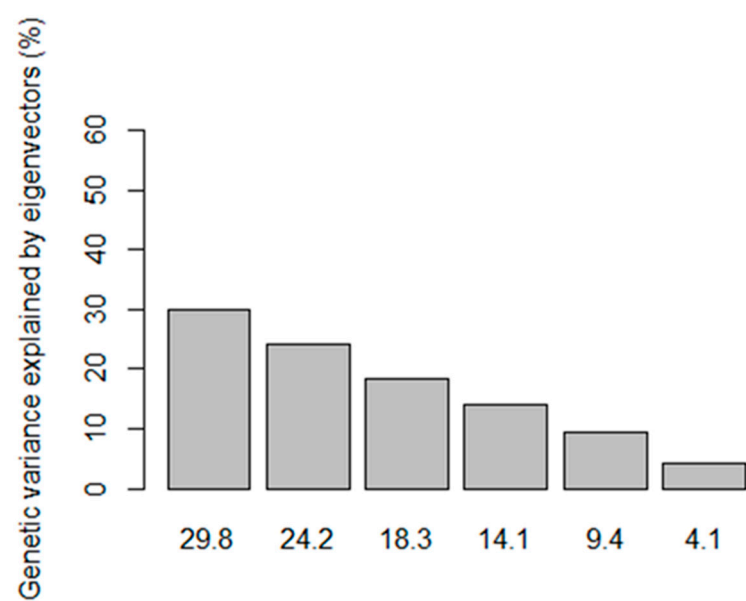

**Figure S7:** Genetic variance explained by eigenvectors

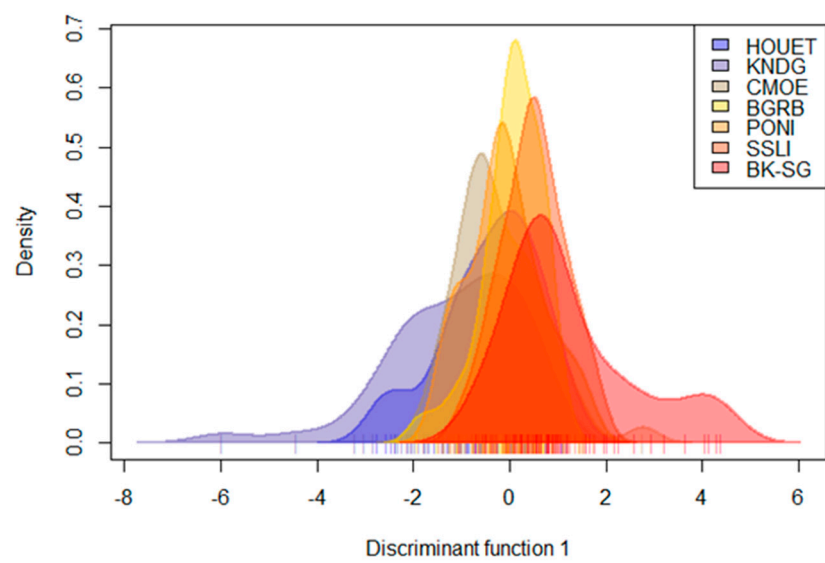

**Figure S8:** Individual density plot on the first discriminant function
